# Supplementary material
Source: publisher figshare collection journal article supplement (https://frontiersin.figshare.com/ndownloader/files/22089786)
Supplement: Supplementary file 1 [file 22089786]

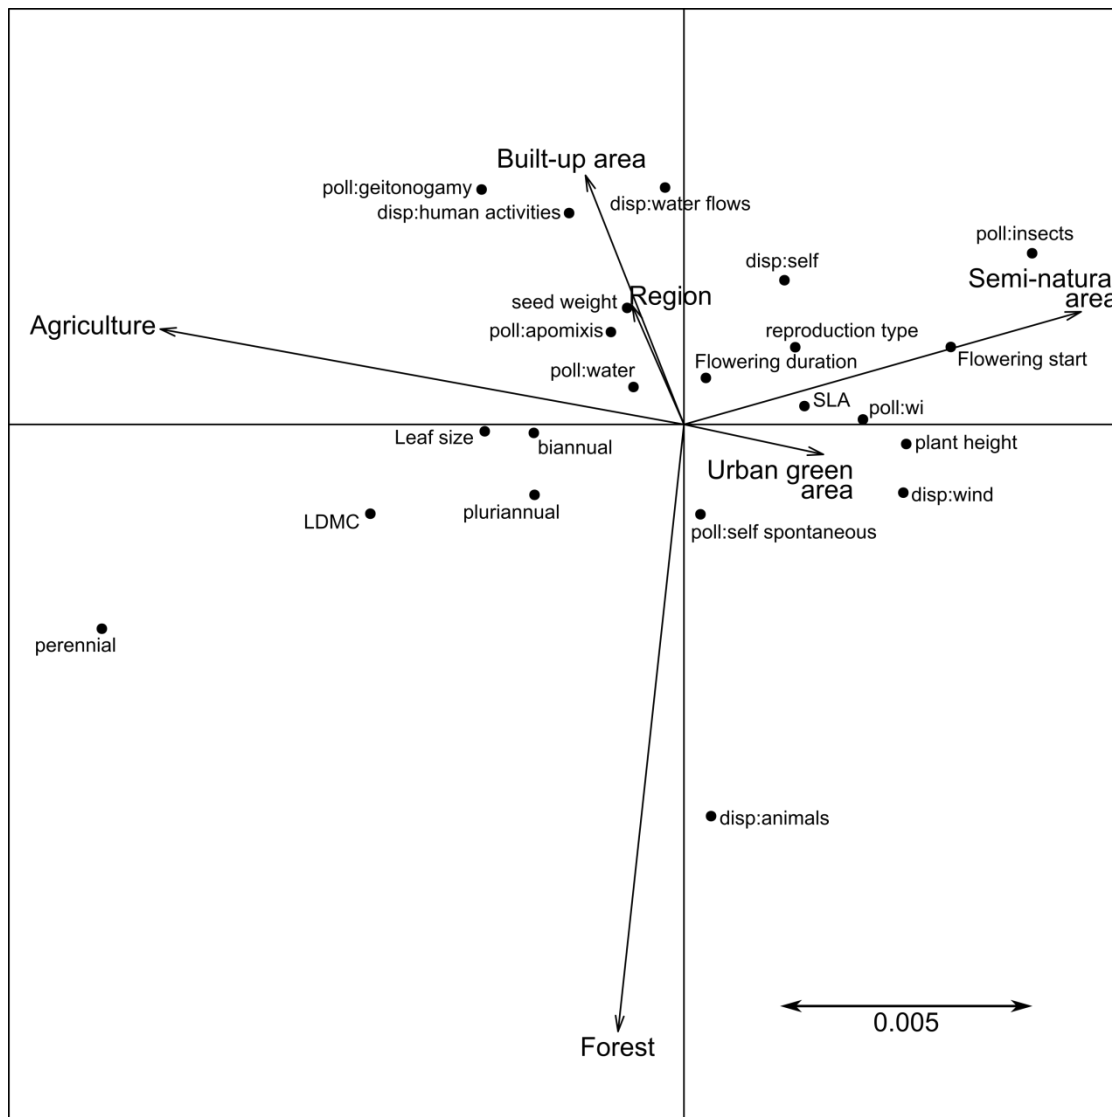

**Supplementary Figure 4.** Result of the second (horizontal) and third (vertical) axes of the principal component analysis applied to the coefficients of generalized least squares models (GLS). GLS was applied to species functional originalities (regional and local) with traits as explanatory variables (Supplementary Table 5). The second axis explained 8%, and the third 6% of the total variation in these coefficients. Variable names are given in Supplementary Table 5. We distinguished, in this figure, the levels of pollination that start with "poll:" from those of the dispersal mode that start by "disp:".
